# Supplementary material
Source: HighWire-hosted journal article supplement (https://thorax.bmj.com/highwire/filestream/173705/field_highwire_adjunct_files/0/6010827figs14.pdf)

Figure 1

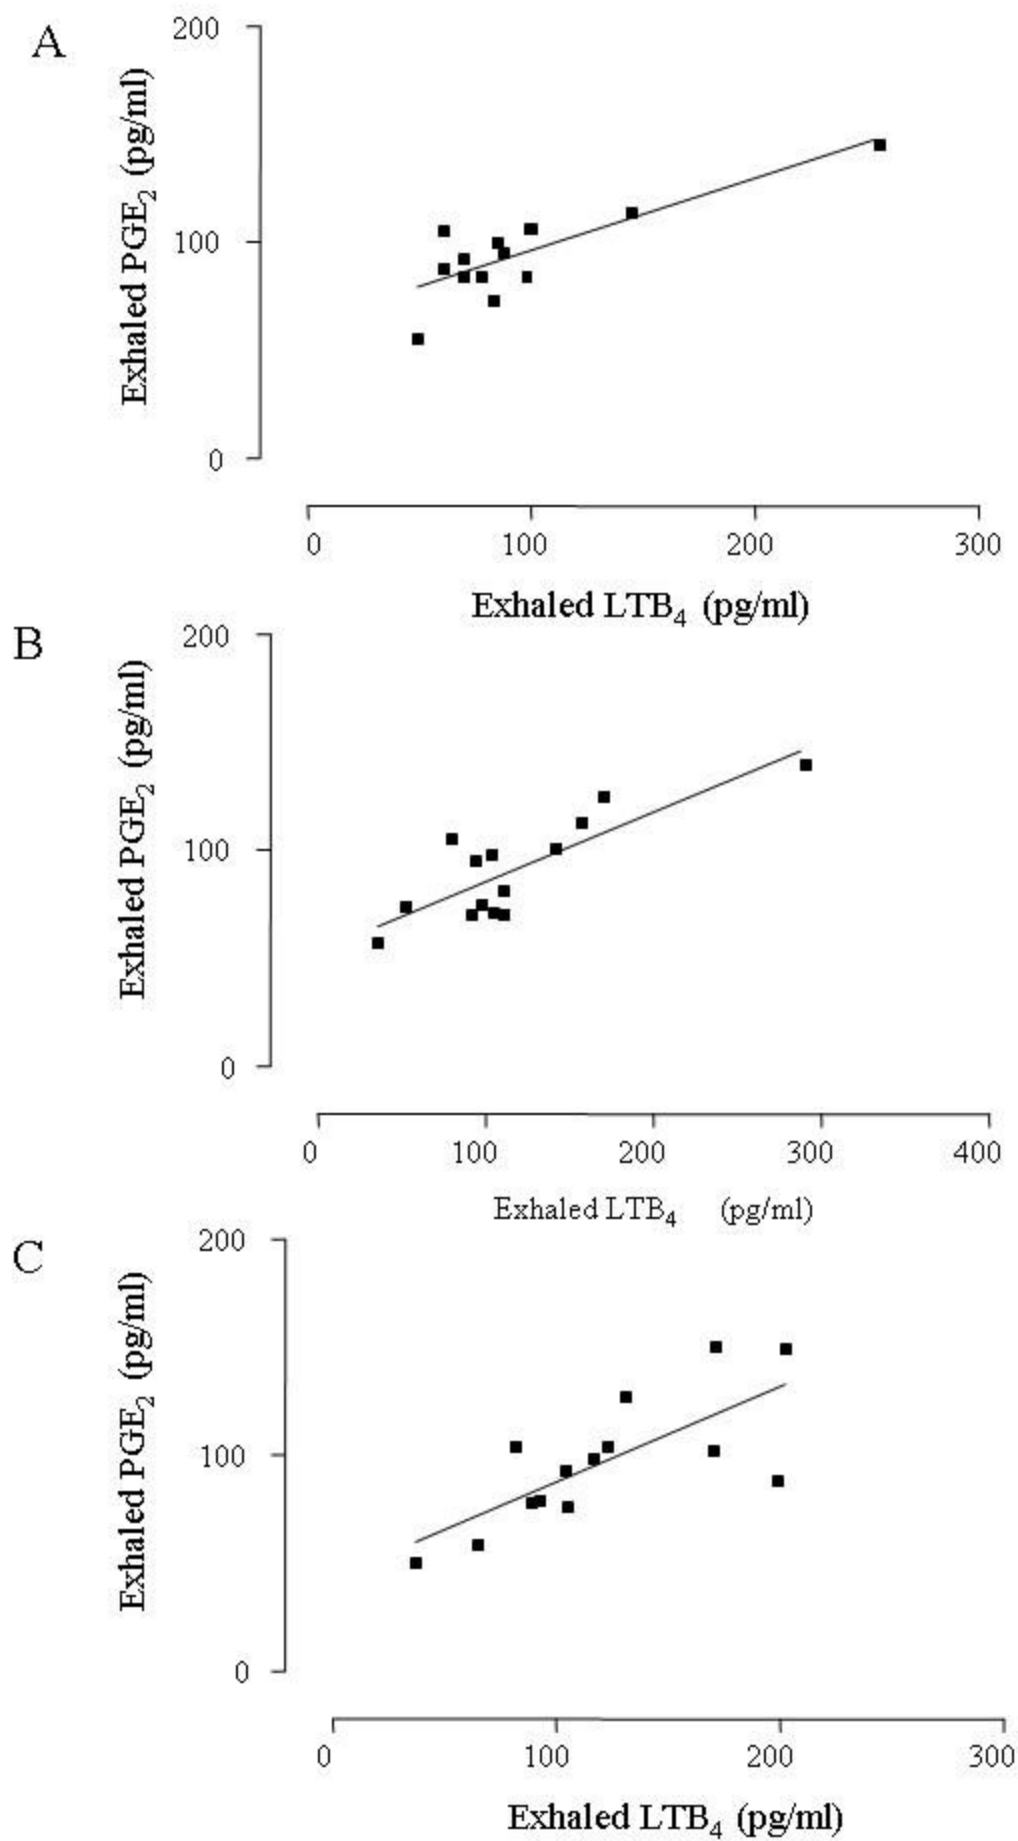

Figure 2

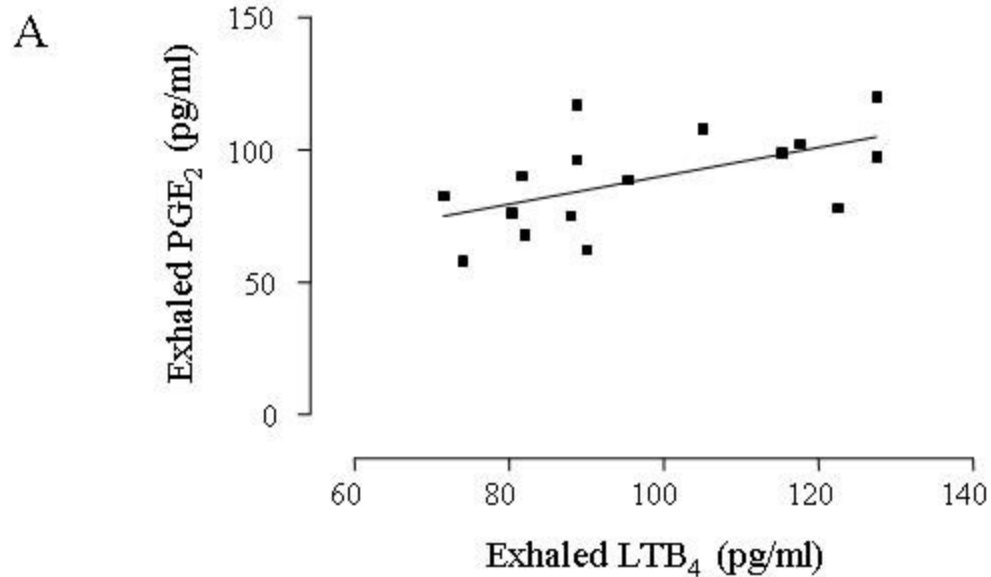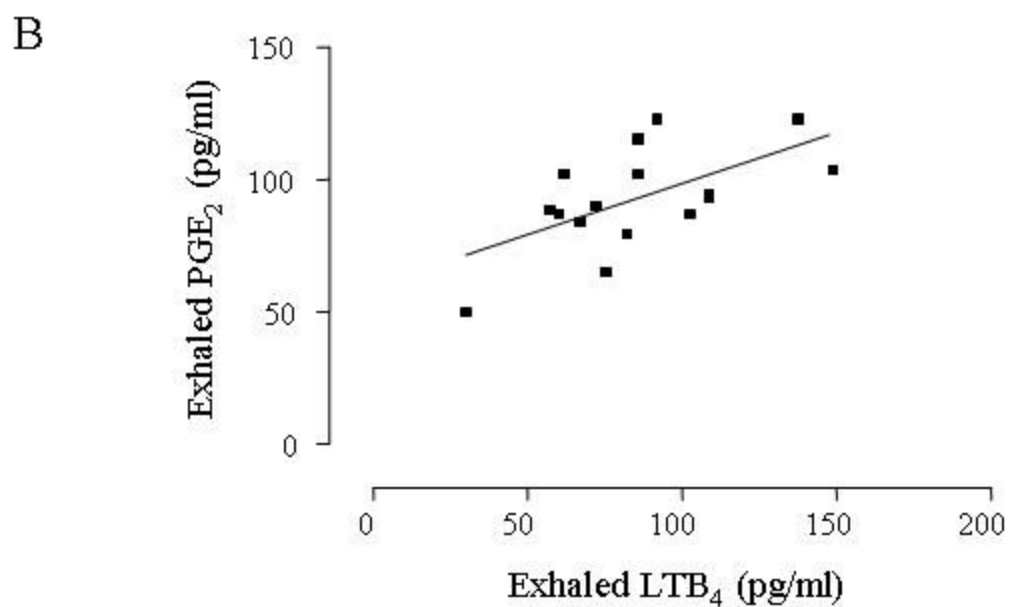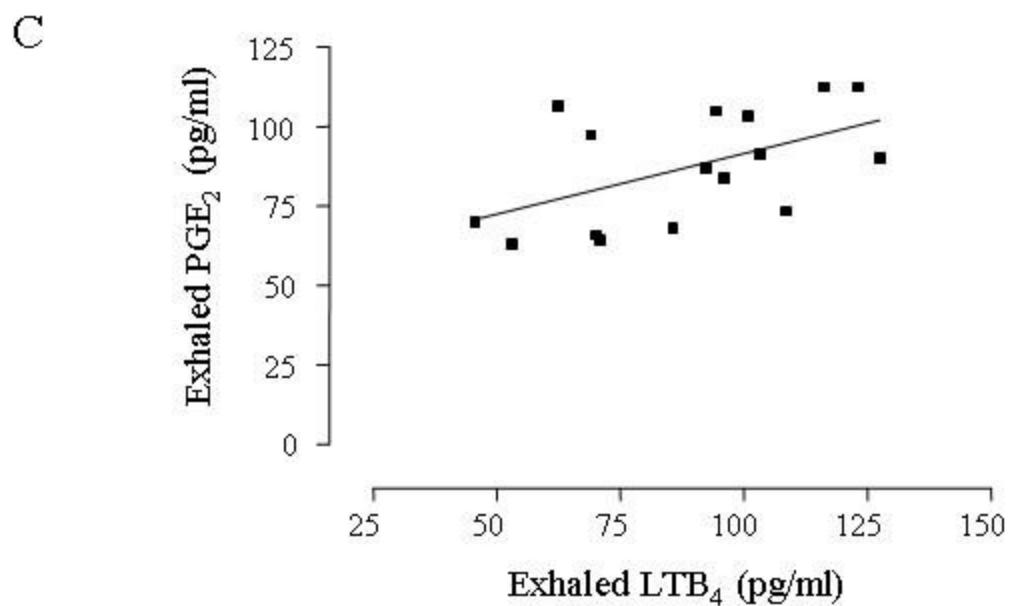

Figure 3

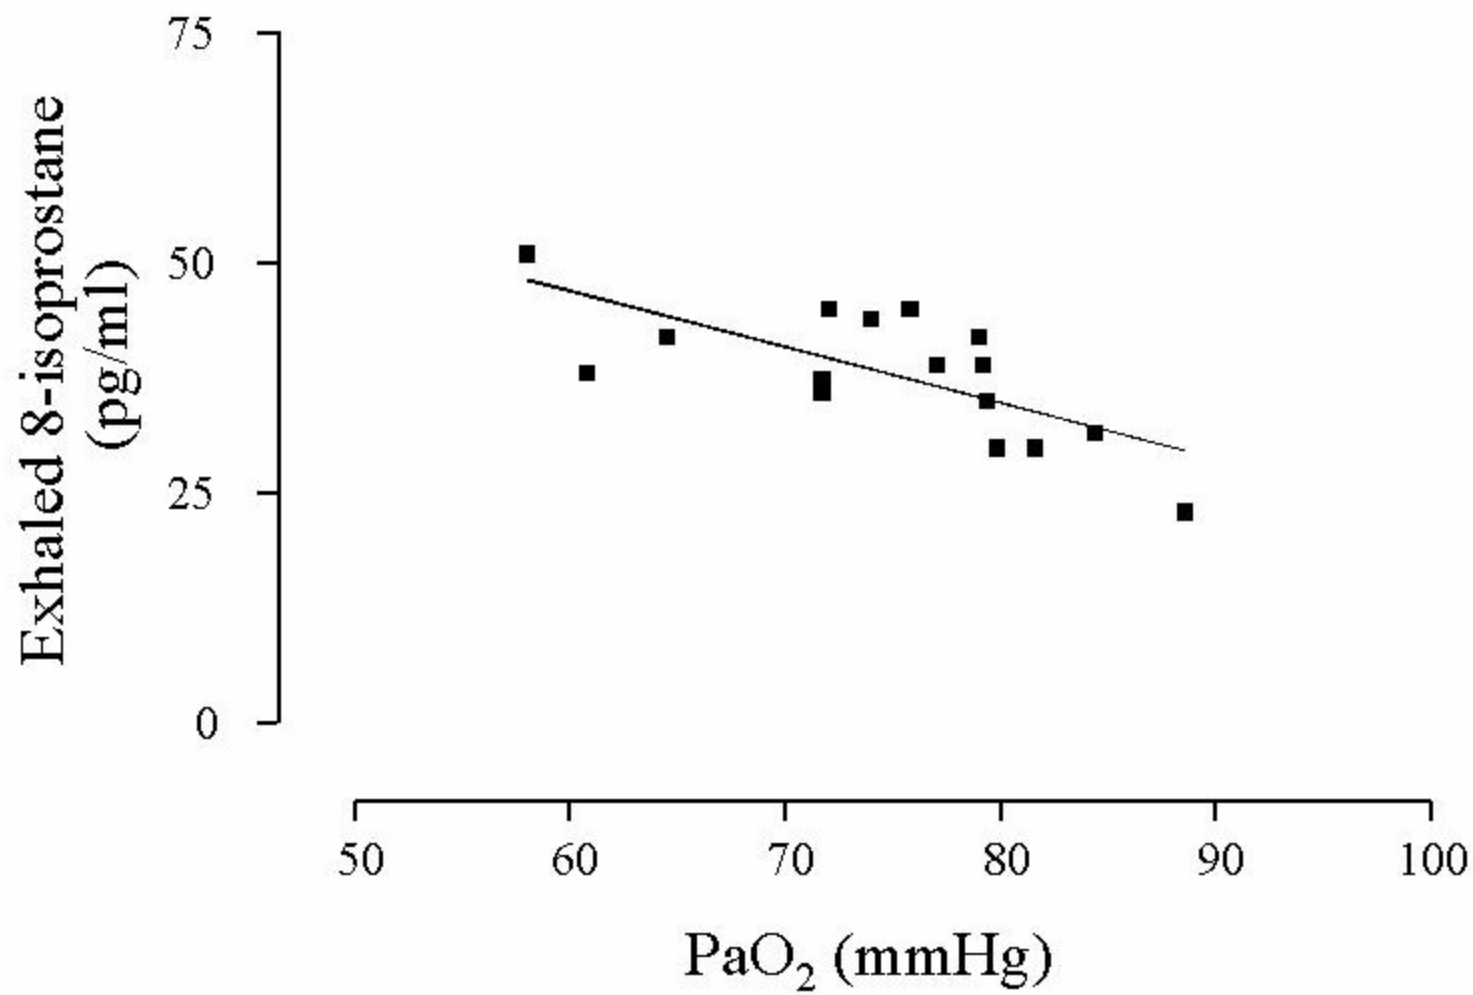

Figure 4

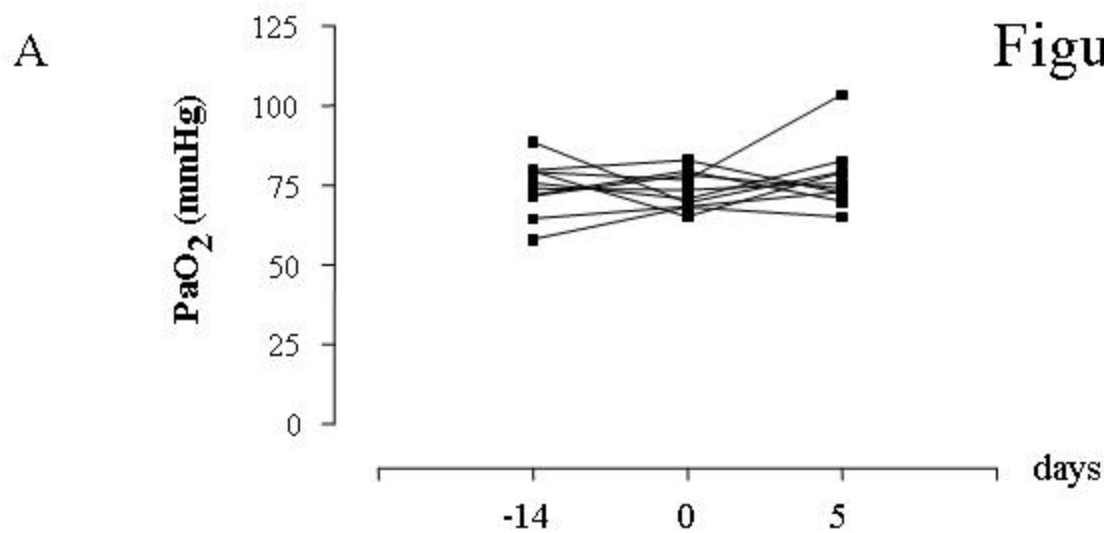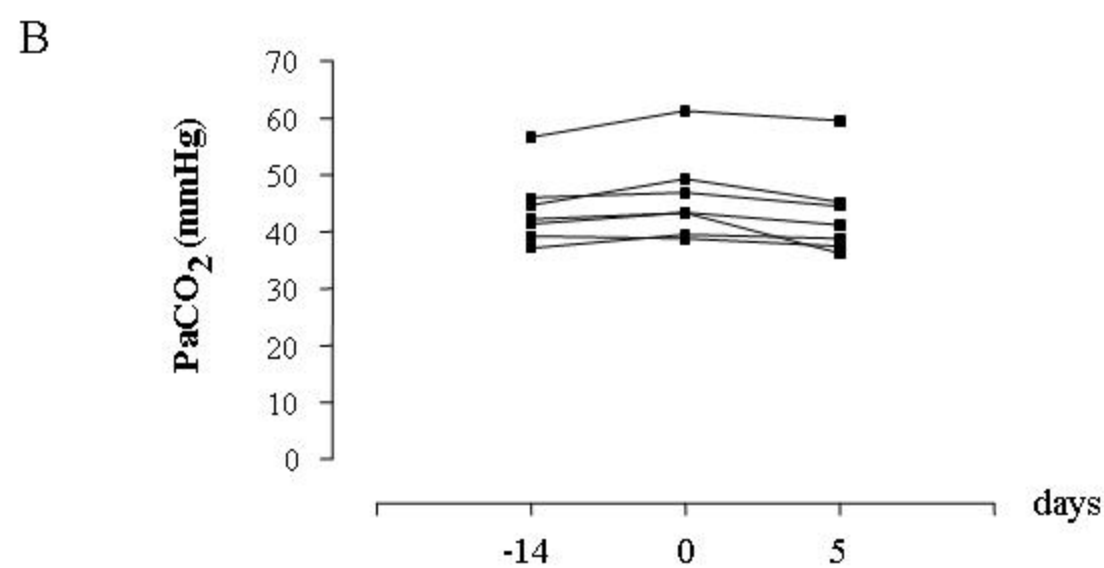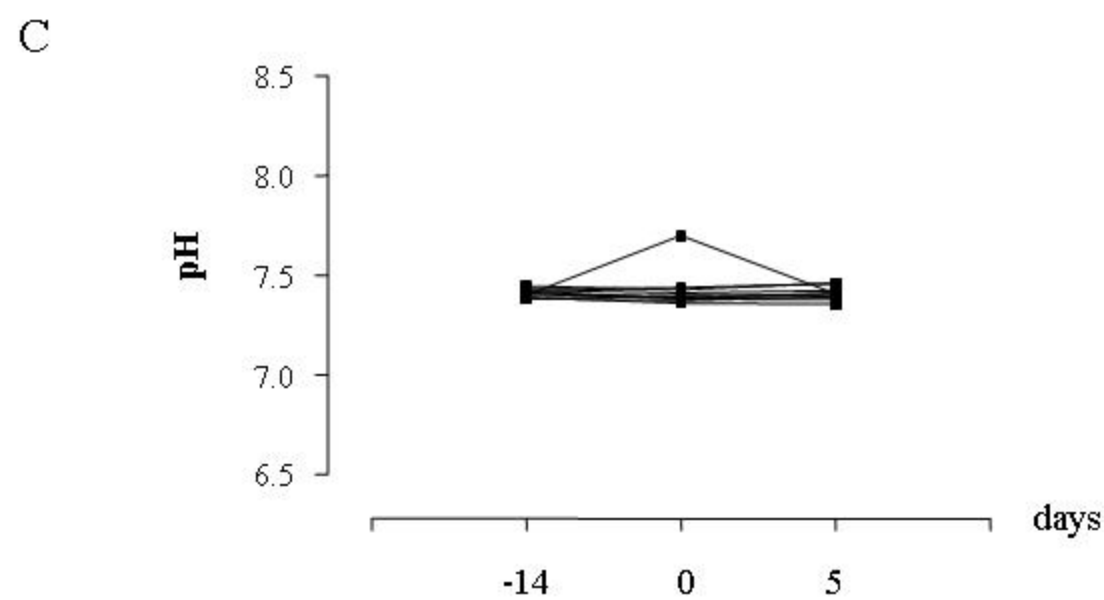

Supplement: 6010827figs14.pdf [file 6010827figs14.pdf]
